# Supplementary material
Source: PubMed Central journal article supplement (PMC7263181)

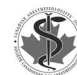

eTable 1 Demographic data

| Variables                                   | Study Population<br>(n=14) |
|---------------------------------------------|----------------------------|
| Age (years)                                 | 62 [58-64]                 |
| BMI (kg.m <sup>-2</sup> )                   | 29.4 [29.2-32.6]           |
| Male sex, n (%)                             | 12 (86)                    |
| <i>Comorbidities, n (%)</i>                 |                            |
| Hypertension                                | 6 (43)                     |
| Diabetes                                    | 6 (43)                     |
| Severe obesity (BMI>35 kg.m <sup>-2</sup> ) | 5 (36)                     |
| Smoking (former or active)                  | 2 (14)                     |
| Chronic renal disease                       | 2 (14)                     |
| Organ transplantation                       | 1 (7)                      |
| Auto immune disease                         | 1 (7)                      |
| COPD/asthma                                 | 0 (0)                      |
| Coronary disease                            | 0 (0)                      |
| Valvular disease or prosthesis              | 0 (0)                      |
| Heart failure                               | 0 (0)                      |
| <i>Chronic medication use, n (%)</i>        |                            |
| ACE inhibitor or ARBs                       | 4 (29)                     |
| Beta blockers                               | 4 (29)                     |
| Diuretics                                   | 2 (14)                     |
| Statins                                     | 3 (21)                     |
| Calcium blockers                            | 4 (29)                     |
| Antidiabetic drugs (other than insulin)     | 3 (21)                     |
| Insulin therapy                             | 2 (14)                     |
| Immunosuppressive drugs                     | 2 (14)                     |

**BMI:** body mass index; **COPD:** chronic obstructive pulmonary disease; **ACE:** Angiotensin converting enzyme; **ARBs:** Angiotensin II receptor blockers. Data are presented as median [interquartile range] or as number (percentage).

eTable 2 Clinical presentation, biological characteristics and respiratory management of patients prior to VV ECMO

| <b>Variables</b>                                               | <b>Study Population<br/>(n=14)</b> |
|----------------------------------------------------------------|------------------------------------|
| <b>Ventilator parameters prior to ECMO procedure</b>           |                                    |
| Respiratory rate (b.min <sup>-1</sup> )                        | 31 [30-32]                         |
| Tidal volume (ml.kg PBW)                                       | 6.1 [5.9-6.2]                      |
| PEEP (cmH <sub>2</sub> O)                                      | 14 [13-15]                         |
| Plateau pressure (cmH <sub>2</sub> O)                          | 29 [28-30]                         |
| Compliance (ml. cmH <sub>2</sub> O <sup>-1</sup> )             | 30 [27-32]                         |
| PaO <sub>2</sub> /FiO <sub>2</sub> ratio                       | 76 [66-83]                         |
| <b>Respiratory management prior to ECMO</b>                    |                                    |
| Length of ICU stay before ECMO (days)                          | 6 [4-8]                            |
| MV duration before ECMO (days)                                 | 3.5 [2-6.5]                        |
| Prone positioning, n (%)                                       | 14 (100)                           |
| Numbers of prone positioning before ECMO, n (%)                | 2 [1-3]                            |
| Inhaled NO, n (%)                                              | 12 (100)                           |
| Inhaled NO doses (ppm)                                         | 10 [10-15]                         |
| Neuromuscular relaxant, n (%)                                  | 12 (100)                           |
| <b>Hemodynamic variables on the day of ECMO initiation</b>     |                                    |
| MAP (mmHg)                                                     | 78 [68-85]                         |
| HR (bpm)                                                       | 76 [67-95]                         |
| Norepinephrine use, n (%)                                      | 9 (56)                             |
| Median dose (mcg.kg <sup>-1</sup> .min <sup>-1</sup> )         | 0.16 [0.07-0.33]                   |
| Dobutamine, n (%)                                              | 1 (7)                              |
| Lactate (mmol. l <sup>-1</sup> )                               | 2.4 [1.5-2.7]                      |
| SOFA score                                                     | 11.5 [10-14]                       |
| <b>Biological investigations on the day of ECMO initiation</b> |                                    |
| PaO <sub>2</sub> (mmHg)                                        | 72 [61-83]                         |
| PaCO <sub>2</sub> (mmHg)                                       | 55 [42-60]                         |
| pH                                                             | 7.31 [7.22-7.36]                   |
| White blood count (mm <sup>-3</sup> )                          | 10300 [8200-14800]                 |

|                                                                       |                        |
|-----------------------------------------------------------------------|------------------------|
| Lymphocyte (.mm <sup>-3</sup> )                                       | 600 [400-1000]         |
| Haemoglobin (g dl <sup>-1</sup> )                                     | 10.3 [9.6-12.05]       |
| Platelet count (mm <sup>-3</sup> )                                    | 275000 [161000-335000] |
| Fibrinogen (g.l <sup>-1</sup> )                                       | 7.5 [5.1-9]            |
| D-dimers (μg.ml <sup>-1</sup> )                                       | 24 [20-26]             |
| Fibrin monomers (μg.ml <sup>-1</sup> )                                | 52 [51.5-105]          |
| Procalcitonin (ng. ml <sup>-1</sup> )                                 | 2 [0.6-3.3]            |
| C-reactive protein (mg. ml <sup>-1</sup> )                            | 257 [181-295]          |
| UFH before ECMO, n (%)                                                | 7 (50)                 |
| Anti-Xa UFH assay measurement (for 7 patients) (UI.ml <sup>-1</sup> ) | 0.19 [0.00-0.20]       |

Data are presented as median [interquartile range] or as number (percentage). **VV ECMO:** **veno-venous** extra corporeal membrane oxygenation; **HR:** heart rate; **MAP:** mean arterial pressure; **MV:** mechanical ventilation; **NO:** nitric oxide; **PBW:** Predicted body weight; **PEEP:** Positive end expiratory pressure; **RR:** respiratory rate; **SOFA:** Sequential Organ Failure Assessment; **UFH:** unfractionated heparin.

eTable 3 Complications and outcomes under ECMO

| Variables                                     | Study Population<br>(n=12) |
|-----------------------------------------------|----------------------------|
| Ventilator associated pneumoniae (VAP), n (%) | 10 (83)                    |
| Documented by BAL                             | 6 (50)                     |
| <i>Citrobacter Koseri</i>                     | 3 (25)                     |
| <i>Escherichia coli</i>                       | 1 (8)                      |
| <i>Enterobacter cloacae</i>                   | 1 (8)                      |
| <i>Proteus vulgaris</i>                       | 1 (8)                      |
| No documentation                              | 4 (33)                     |
| Timing from ECMO initiation to VAP, days      | 7.5 [2-12]                 |
| Thrombotic events, n (%)                      | 11 (92)                    |
| Deep vein thrombosis                          | 4 (33)                     |
| ECMO circuit thrombosis                       | 3 (25)                     |
| RRT circuit thrombosis                        | 2 (17)                     |
| Pulmonary embolism                            | 2 (17)                     |
| Cannula infection, n (%)                      | 3 (25)                     |
| <i>Enterococcus faecium</i>                   | 1 (8)                      |
| <i>Escherichia coli</i>                       | 1 (8)                      |
| <i>Staphylococcus epidermidis</i>             | 1 (8)                      |
| AKI KDIGO 2 or KDIGO 3, n (%)                 | 11 (92)                    |
| RRT requirement                               | 8 (67)                     |
| Massive bleeding                              | 3 (25)                     |
| Pneumothorax                                  | 3 (25)                     |
| Acute hepatic failure (Defined by PT<50%)     | 2 (17)                     |
| Tracheotomy                                   | 1 (8)                      |
| Recovered cardiac arrest                      | 1 (8)                      |
| HIT                                           | 1 (8)                      |
| <b>ECMO course</b>                            |                            |

|                                           |            |
|-------------------------------------------|------------|
| Weaned from ECMO, n (%)                   | 10 (83)    |
| Died under ECMO, n (%)                    | 2 (17)     |
| ECMO duration (days)                      | 12 [9-22]  |
| <b>ICU Course</b>                         |            |
| Mechanical ventilation duration (days)    | 25 [19-30] |
| Weaned from mechanical ventilation, n (%) | 9 (75)     |
| Length of stay (days)                     | 30 [26-41] |
| Discharged from ICU, n (%)                | 8 (67)     |
| Died, n (%)                               | 4 (33)     |
| Still hospitalized in ICU, n (%)          | 0          |

Data are presented as median [interquartile range] or as number (percentage). **BAL:** bronchoalveolar lavage. **AKI:** Acute kidney injury. **ECMO:** extra corporeal membrane oxygenation; **HIT:** heparin induced thrombocytopenia; **ICU:** Intensive care unit; **RRT:** Renal replacement therapy; **PT:** prothrombin time.

**eFigure Biological and respiratory parameters time-course**

A: Biological parameters time-course

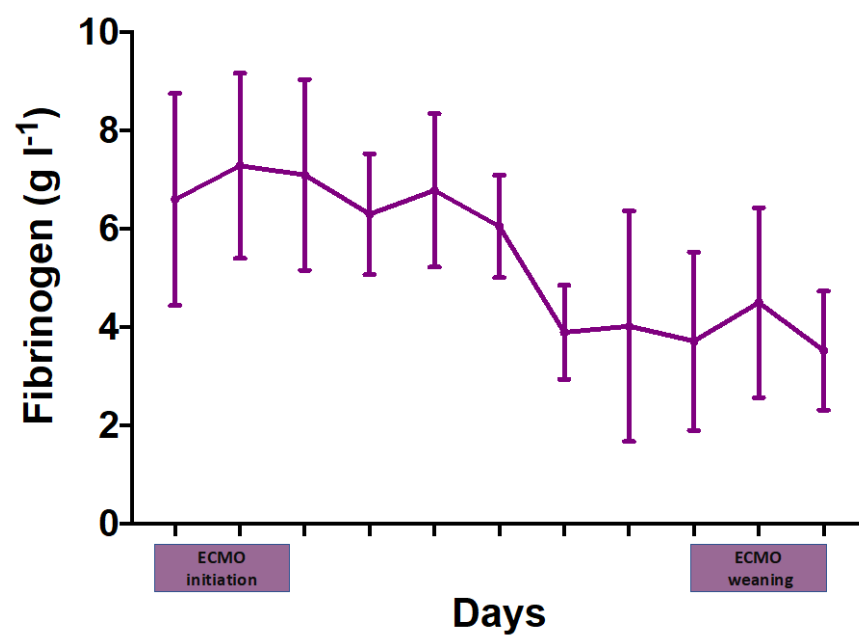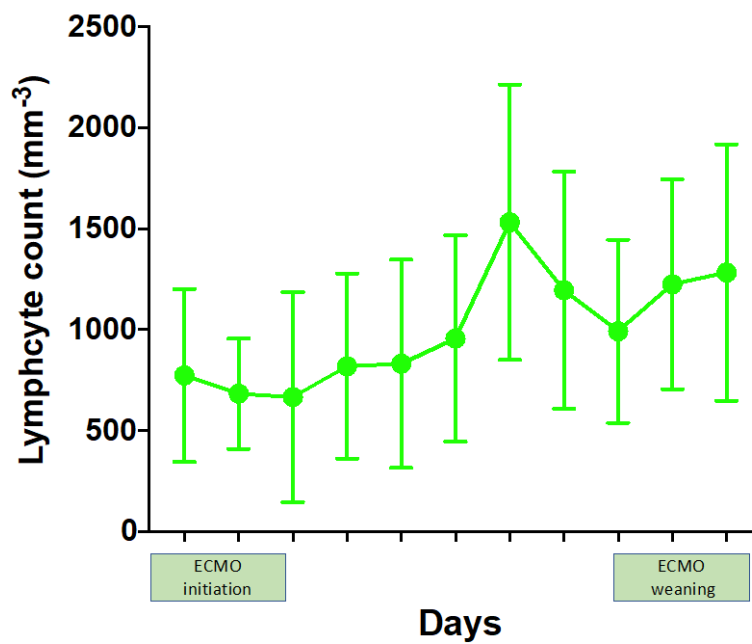

**eFigure Biological and respiratory parameters time course**

B: Respiratory parameters time-course

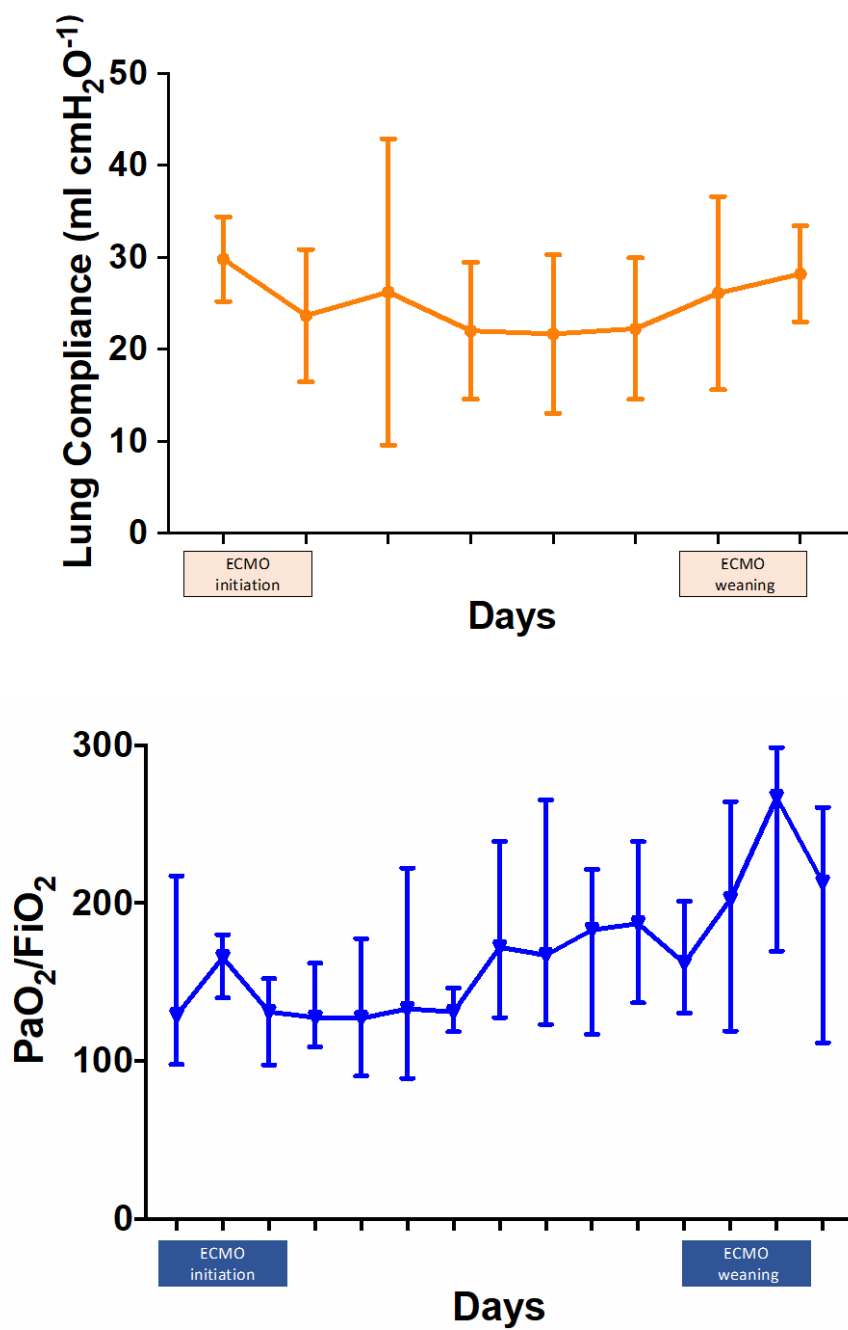

Supplement: 12630_2020_1727_MOESM1_ESM.pdf [file 12630_2020_1727_MOESM1_ESM.pdf]
